# Supplementary material for: Perioperative management of antiplatelet therapy in patients undergoing non-cardiac surgery following coronary stent placement: a systematic review
Source: Springer Nature journal article supplement (doi:10.1186/s13643-017-0635-z), 2018-01-10
Supplement: MOESM3 [file 15356224]

**Additional File 3: PRISMA Flow Diagram**

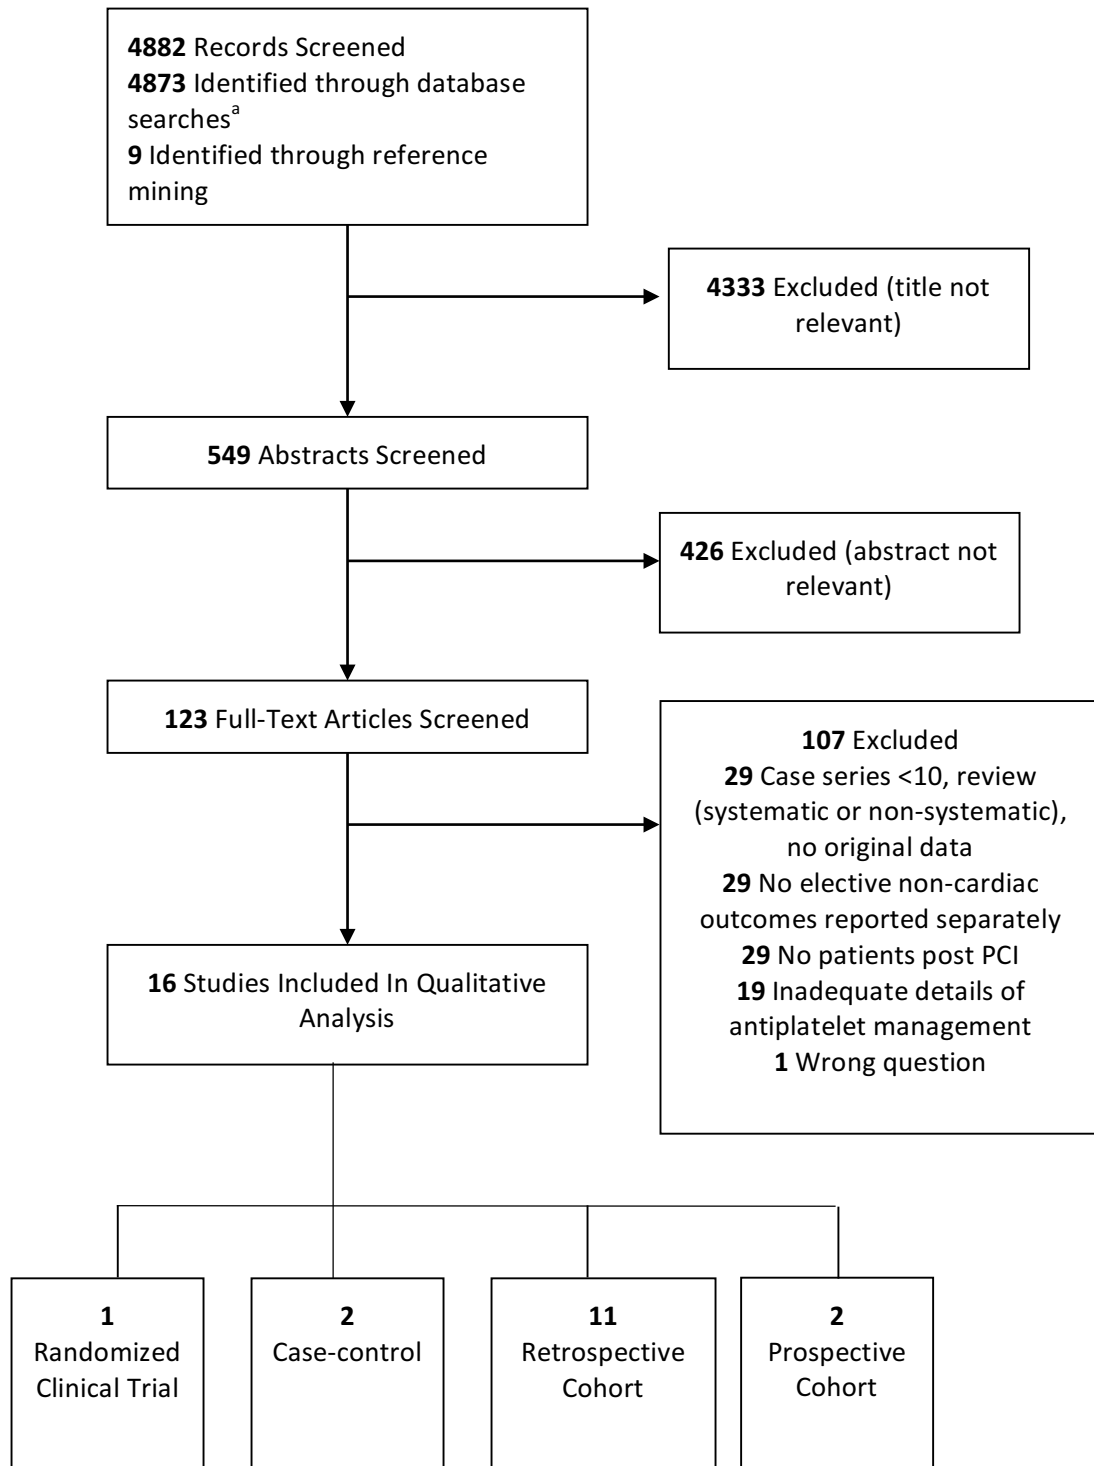

PCI = percutaneous coronary intervention

- a. Search results were combined from Scopus, Web of Science, and PubMed. See Appendix 2 for details.
